# Supplementary material
Source: PubMed Central journal article supplement (PMC5679207)
Supplement: NIHMS902266-supplement-Supplement.pdf [file NIHMS902266-supplement-Supplement.pdf]

**Supplemental Figure 1.** Participant flow chart

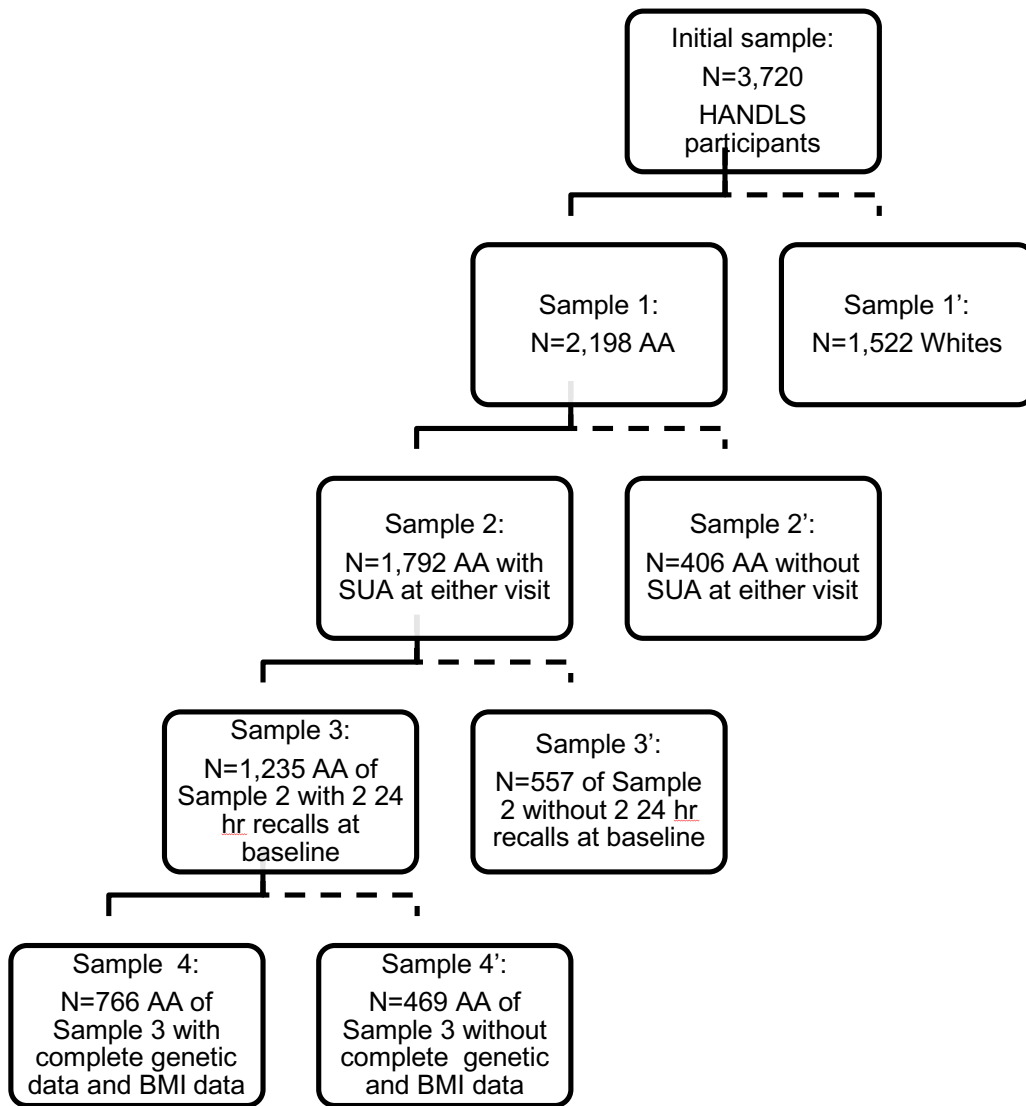

AA=African-American; BMI=Body Mass Index; HANDLS=Healthy Aging in Neighborhoods of Diversity across the Life Span; SUA=Serum Uric Acid.

### **Appendix 1. Genotyping and quality control**

HANDLS participants were genotyped using the Illumina 1M genotyping array. A total of 1,024 individuals were successfully genotyped. Sample quality control inclusion criteria were: **(1)** concordance between self-reported sex and X-chromosome based sex; **(2)** >95% call rate per participant (across all equivalent arrays), **(3)** concordance between self-reported African ancestry and genotyped SNPs confirmed ancestry, and **(4)** proportional sharing of genotypes < 15% between samples, excluding close relatives from the final sample. Moreover, SNPs in HANDLS were selected when the following criteria were met: **(1)** Hardy-Weinberg equilibrium (HWE)  $p\text{-value} > 10^{-7}$ ; **(2)** Missing by haplotype  $p\text{-values} > 10^{-7}$ ; **(3)** Minor allele frequency  $> 0.01$ , and **(4)** Call rate  $> 95\%$ . Basic quality control and data management for each genotype was conducted using PLINKv1.06. (1) Cryptic relatedness was estimated via pairwise identity by descent analyses in PLINK and confirmed using RELPAIR. (2) STRUCTUREv2.3(3-5) and the multidimensional scaling (MDS) function in PLINKv1.06 were used to determine ancestry among HANDLS participants. HANDLS participants with component vector estimates consistent with the HapMap African ancestry samples for the first 4 component vectors were included. Moreover, in our main analyses, we adjusted for all 10 principal components to control for any residual effects of population structure. (6). SNPs that passed the above quality control criteria were used for genotype imputation using MACH and minimac softwares (<http://www.sph.umich.edu/csg/abecasis/mach/>). The 1000 Genomes Project phase 1 alpha freeze multiethnic panel were used as a reference population to impute SNPs. Imputed SNP with imputation quality measure of  $R^2 < 0.3$  or minor allele frequency of  $< 1\%$  were excluded from the analysis. Serum uric acid (SUA) associated SNPs identified by genome-wide association and candidate gene studies were selected from those SNPs that passed the imputation quality control criteria.

**References:**

1. Purcell S, Neale B, Todd-Brown K, Thomas L, Ferreira MA, Bender D, Maller J, Sklar P, de Bakker PI, Daly MJ, et al. PLINK: a tool set for whole-genome association and population-based linkage analyses. *Am J Hum Genet* 2007;81(3):559-75. doi: S0002-9297(07)61352-4 [pii]  
10.1086/519795.
2. Epstein MP, Duren WL, Boehnke M. Improved inference of relationship for pairs of individuals. *Am J Hum Genet* 2000;67(5):1219-31. doi: S0002-9297(07)62952-8 [pii]  
10.1016/S0002-9297(07)62952-8.
3. Pritchard JK, Stephens M, Donnelly P. Inference of population structure using multilocus genotype data. *Genetics* 2000;155(2):945-59.
4. Falush D, Stephens M, Pritchard JK. Inference of population structure using multilocus genotype data: linked loci and correlated allele frequencies. *Genetics* 2003;164(4):1567-87.
5. Falush D, Stephens M, Pritchard JK. Inference of population structure using multilocus genotype data: dominant markers and null alleles. *Mol Ecol Notes* 2007;7(4):574-8. doi: 10.1111/j.1471-8286.2007.01758.x.
6. Price AL, Patterson NJ, Plenge RM, Weinblatt ME, Shadick NA, Reich D. Principal components analysis corrects for stratification in genome-wide association studies. *Nature genetics* 2006;38(8):904-9. doi: ng1847 [pii]  
10.1038/ng1847.

**Supplemental Table 1. List of SNP selected from various GWAS and confirmatory studies<sup>(1; 2; 3; 4; 5)</sup> shown to be associated with high serum uric acid (SNPhsua)**

| <b>Variant</b>                                | <b>Location</b> | <b>Risk allele<br/>(Higher SUA)</b> | <b>Other allele<br/>(Lower SUA)</b> | <b>Population,<br/>references</b>                                                                                                                                                                    | <b>Minor<br/>Allele<br/>Frequency</b> | <b>Status</b> |
|-----------------------------------------------|-----------------|-------------------------------------|-------------------------------------|------------------------------------------------------------------------------------------------------------------------------------------------------------------------------------------------------|---------------------------------------|---------------|
| <b><i>SLC2A9</i></b><br><b>(chromosome 4)</b> |                 |                                     |                                     |                                                                                                                                                                                                      |                                       |               |
| <b>rs1014290</b>                              | <b>Intron 3</b> | <b>T</b>                            | <b>C</b>                            | <b>European ancestry<sup>(6)</sup></b>                                                                                                                                                               | <b>G=0.33</b>                         | <b>A</b>      |
| <b>rs6449213</b>                              | <b>Intron 4</b> | <b>T</b>                            | <b>C</b>                            | <b>White<sup>(6; 7; 8; 9; 10)</sup>,<br/>AA<sup>(11; 12)</sup>, Hispanic<sup>(2)</sup></b>                                                                                                           | <b>C=0.14</b>                         | <b>A</b>      |
| rs734553                                      | Intron 6        | T                                   | G                                   | White, <sup>(13; 14; 15)</sup><br>Icelandic, <sup>(16)</sup> AA <sup>(12)</sup>                                                                                                                      | G=0.30                                | D             |
| <b>rs7442295</b>                              | <b>Intron 6</b> | <b>A</b>                            | <b>G</b>                            | <b>White<sup>(7; 14; 15; 17)</sup></b>                                                                                                                                                               | <b>G=0.26</b>                         | <b>A</b>      |
| rs737269                                      | Intron 7        | T                                   | C                                   | European ancestry <sup>(6; 15)</sup>                                                                                                                                                                 | T=0.41                                | C             |
| rs6855911                                     | Intron 7        | A                                   | G                                   | White, <sup>(7; 14; 15; 17)</sup><br>AA <sup>(12)</sup>                                                                                                                                              | G=0.30                                | D             |
| <b>rs13129697</b>                             | <b>Intron 7</b> | <b>T</b>                            | <b>G</b>                            | <b>White,<sup>(15; 18)</sup> AA<sup>(12)</sup>,<br/>Hispanic<sup>(2)</sup></b>                                                                                                                       | <b>G=0.48</b>                         | <b>A</b>      |
| <b>rs2241480</b>                              | <b>Intron 8</b> | <b>T</b>                            | <b>A/C</b>                          | <b>European ancestry<sup>(12)</sup></b>                                                                                                                                                              | <b>T=0.33</b>                         | <b>B</b>      |
| rs7663032                                     | Intron 9        | T                                   | G/C                                 | AA, <sup>(12)</sup> Croatian <sup>(15)</sup>                                                                                                                                                         | C=0.37                                | D             |
| rs3775948                                     | Intron 9        | C                                   | G                                   | Croatian, <sup>(15)</sup> AA <sup>(11)</sup>                                                                                                                                                         | G=0.34                                | D             |
| rs16890979                                    | Intergenic      | C                                   | T                                   | White, <sup>(15; 19; 20)</sup> AA <sup>(12)</sup> ,<br>Amish, <sup>(21)</sup> Croatian,<br><sup>(15)</sup> Pacific Islander, <sup>(20)</sup><br>New Zealander <sup>(20)</sup>                        | T=0.26                                | D             |
| rs717615                                      | Intergenic      | A                                   | G                                   | Croatian <sup>(15)</sup>                                                                                                                                                                             | G=0.43                                | C             |
| rs6856396                                     | Intergenic      | T                                   | A                                   | AA <sup>(11)</sup>                                                                                                                                                                                   | A=0.14                                | C             |
| rs11942223                                    | Intergenic      | T                                   | C                                   | European <sup>(22)</sup>                                                                                                                                                                             | C=0.27                                | D             |
| rs11723388                                    | Intergenic      | G                                   | A                                   | Hispanic <sup>(2)</sup>                                                                                                                                                                              | A=0.12                                | C             |
| rs11721501                                    | Intergenic      | G                                   | A                                   | Hispanic <sup>(2)</sup>                                                                                                                                                                              | A=0.13                                | D             |
| rs6843466                                     | Intergenic      | G                                   | A                                   | Hispanic <sup>(2)</sup>                                                                                                                                                                              | T=0.49                                | E             |
| rs17251963                                    | Intergenic      | A                                   | G                                   | Hispanic <sup>(2)</sup>                                                                                                                                                                              | C=0.13                                | D             |
| rs13113918                                    | Exon 3          | G                                   | A                                   | Hispanic <sup>(2)</sup>                                                                                                                                                                              | A=0.18                                | D             |
| rs7683856                                     | Intron          | G                                   | A                                   | Hispanic <sup>(2)</sup>                                                                                                                                                                              | A=0.18                                | D             |
| <b>rs9991278</b>                              | <b>Intron</b>   | <b>G</b>                            | <b>A</b>                            | <b>Hispanic<sup>(2)</sup></b>                                                                                                                                                                        | <b>T=0.17</b>                         | <b>A</b>      |
| rs11723439                                    | Intron          | G                                   | A                                   | Hispanic <sup>(2)</sup>                                                                                                                                                                              | T=0.12                                | C             |
| rs4697745                                     | Intergenic      | G                                   | A                                   | Hispanic <sup>(2)</sup>                                                                                                                                                                              | A=0.19                                | C             |
| rs7675964                                     | Intron          | G                                   | A                                   | Hispanic <sup>(2)</sup>                                                                                                                                                                              | T=0.47                                | D             |
| rs938552                                      | Intron          | G                                   | A                                   | Hispanic <sup>(2)</sup>                                                                                                                                                                              | T=0.26                                | D             |
| rs12510549                                    | Intergenic      | A                                   | G                                   | Hispanic <sup>(2)</sup>                                                                                                                                                                              | C=0.17                                | C             |
| rs11722228                                    | Intron          | T                                   | C                                   | Chinese <sup>(3)</sup>                                                                                                                                                                               | T=0.31                                | C             |
| <b>rs12498742</b>                             | <b>Intron</b>   | <b>A</b>                            | <b>G</b>                            | <b>European<sup>(5)</sup></b>                                                                                                                                                                        | <b>G=0.30</b>                         | <b>A</b>      |
| <b><i>ABCG2</i></b><br><b>(chromosome 4)</b>  |                 |                                     |                                     |                                                                                                                                                                                                      |                                       |               |
| rs2231137                                     | Exon 2          | A                                   | G                                   | Japanese <sup>(23)</sup>                                                                                                                                                                             | A= 0.16                               | D             |
| rs72552713<br>(Q126X)                         | Exon 4          | T                                   | C                                   | Japanese <sup>(23)</sup>                                                                                                                                                                             | A=0.001                               | F             |
| <b>rs2231142(Q141<br/>K)</b>                  | <b>Exon 5</b>   | <b>T</b>                            | <b>G</b>                            | <b>White,<sup>(13; 14; 15; 19; 24)</sup>,<br/>European,<sup>(5)</sup> African,<br/><sup>(12; 19)</sup> Chinese,<sup>(3; 25)</sup><br/>Icelandic,<sup>(16)</sup><br/>Japanese,<sup>(23; 26)</sup></b> | <b>T=0.12</b>                         | <b>A</b>      |

Online Supplemental Material

|                                                         |                   |          |          |                                                                                                   | <b>Pacific Islander,<sup>(27)</sup><br/>New Zealander<sup>(27; 28)</sup></b> |          |  |
|---------------------------------------------------------|-------------------|----------|----------|---------------------------------------------------------------------------------------------------|------------------------------------------------------------------------------|----------|--|
| rs2199936                                               | Intergenic        | A        | G        | White <sup>(13; 15; 18)</sup>                                                                     | N/A                                                                          | E        |  |
| rs4148152                                               | Intron            | T        | C        | Chinese <sup>(3)</sup>                                                                            | C=0.16                                                                       | C        |  |
| rs3114018                                               | Intron            | G        | T        | Chinese <sup>(3)</sup>                                                                            | C=0.50                                                                       | C        |  |
| <b><i>SLC22A12</i></b><br><b><i>(chromosome 11)</i></b> |                   |          |          |                                                                                                   |                                                                              |          |  |
| rs11231825                                              | Exon 1            | C        | T        | Chinese, <sup>(29)</sup> White, <sup>(13;</sup><br>30) AA <sup>(12)</sup>                         | C=0.39                                                                       | D        |  |
| rs12800450                                              | Exon 2            | G        | T        | AA <sup>(12)</sup>                                                                                | <b>T=0.01<sup>(12)</sup></b>                                                 | E        |  |
| rs559946                                                | Intron 3          | C        | T        | Chinese <sup>(31)</sup>                                                                           | T=0.43                                                                       | C        |  |
| rs893006                                                | Intron 4          | G        | T        | Japanese, <sup>(32)</sup><br>Chinese <sup>(33)</sup>                                              | G/T=0.50                                                                     | C        |  |
| rs1529909                                               | Intron 4          | T        | C        | Korean <sup>(34)</sup>                                                                            | C=0.39                                                                       | E        |  |
| rs17300741                                              | Intron 4          | A        | G        | European <sup>(13; 35)</sup>                                                                      | G=0.33                                                                       | C        |  |
| <b>rs7932775</b>                                        | <b>Exon 8</b>     | <b>C</b> | <b>T</b> | <b>German,<sup>(30)</sup><br/>Chinese,<sup>(29; 31)</sup><br/>Solomon Islander<sup>(29)</sup></b> | <b>C=0.40</b>                                                                | <b>A</b> |  |
| rs505802                                                | Intergenic        | C        | T        | European, <sup>(13; 15)</sup> AA <sup>(12)</sup>                                                  | T=0.43                                                                       | D        |  |
| rs11602903                                              | Intergenic        | A        | T        | German, <sup>(30)</sup> Chinese <sup>(31)</sup>                                                   | T=0.39                                                                       | D        |  |
| rs3825018                                               | Intergenic        | G        | A        | European <sup>(22)</sup>                                                                          | A=0.39                                                                       | D        |  |
| <b><i>SLC16A9</i></b><br><b><i>(chromosome 10)</i></b>  |                   |          |          |                                                                                                   |                                                                              |          |  |
| rs12356193                                              | Intron 1          | A        | G        | European, <sup>(13)</sup><br>Icelandic <sup>(16)</sup>                                            | G=0.09                                                                       | C        |  |
| <b><i>SLC17A1</i></b><br><b><i>(chromosome 6)</i></b>   |                   |          |          |                                                                                                   |                                                                              |          |  |
| rs1165196                                               | Exon 7            | A        | G        | White, <sup>(18)</sup> Icelandic, <sup>(16)</sup><br>Japanese <sup>(19; 36)</sup>                 | G=0.28                                                                       | D        |  |
| rs1183201                                               | Intron 10         | T        | A        | European <sup>(13)</sup>                                                                          | A=0.29                                                                       | D        |  |
| rs11751616                                              | Intergenic        | A        | G        | AA <sup>(12)</sup>                                                                                | G=0.02                                                                       | C        |  |
| rs2051541                                               | Intergenic        | G        | A        | European ancestry <sup>(12)</sup>                                                                 | A=0.50                                                                       | C        |  |
| <b>rs3799344</b>                                        | <b>Intergenic</b> | <b>C</b> | <b>T</b> | <b>European<sup>(37)</sup></b>                                                                    | <b>T=0.37</b>                                                                | <b>A</b> |  |
| <b><i>SLC17A3</i></b><br><b><i>(chromosome 6)</i></b>   |                   |          |          |                                                                                                   |                                                                              |          |  |
| rs1165205                                               | Intron 1          | C        | T        | White <sup>(19)</sup>                                                                             | T=0.31                                                                       | C        |  |
| <b><i>SLC22A11</i></b><br><b><i>(chromosome 11)</i></b> |                   |          |          |                                                                                                   |                                                                              |          |  |
| rs10792443                                              | Intron 4          | G        | C        | European ancestry <sup>(12)</sup>                                                                 | C=0.39                                                                       | C        |  |
| rs2078267                                               | Intron 6          | C        | T        | European <sup>(5)</sup> , White, <sup>(18)</sup><br>Icelandic <sup>(16)</sup>                     | T=0.23                                                                       | C        |  |
| <b><i>GCKR</i></b><br><b><i>(chromosome 2)</i></b>      |                   |          |          |                                                                                                   |                                                                              |          |  |
| rs780094                                                | Intron 16         | T        | C        | European <sup>(13; 35)</sup>                                                                      | T=0.30                                                                       | C        |  |
| rs780093                                                | Intron 17         | T        | C        | White, <sup>(18)</sup> Icelandic <sup>(16)</sup>                                                  | T=0.29                                                                       | D        |  |
| rs814295                                                | Intron 17         | G        | A        | AA <sup>(12)</sup>                                                                                | G=0.23                                                                       | C        |  |
| <b>rs1260326</b>                                        | <b>Exon 15</b>    | <b>T</b> | <b>C</b> | <b>European<sup>(5)</sup></b>                                                                     | <b>T=0.29</b>                                                                | <b>A</b> |  |
| <b><i>LRRC16A</i></b><br><b><i>(chromosome 6)</i></b>   |                   |          |          |                                                                                                   |                                                                              |          |  |
| rs9321453                                               | Intron 12         | T        | C        | AA <sup>(12)</sup>                                                                                | T=0.24                                                                       | C        |  |
| <b>rs742132</b>                                         | <b>Intron 30</b>  | <b>A</b> | <b>G</b> | <b>European<sup>(13; 35)</sup></b>                                                                | <b>G=0.29</b>                                                                | <b>A</b> |  |

Online Supplemental Material

| <b>(G increases SUA<br/>in our sample)</b>                                                                                               |                   |          |          |                                                                                                                 |               |          |
|------------------------------------------------------------------------------------------------------------------------------------------|-------------------|----------|----------|-----------------------------------------------------------------------------------------------------------------|---------------|----------|
| <b><i>PDZK1</i></b><br><b>(chromosome 1)</b>                                                                                             |                   |          |          |                                                                                                                 |               |          |
| rs882211                                                                                                                                 | Intron 1          | C        | G        | AA <sup>(12)</sup>                                                                                              | G=0.06        | C        |
| rs1967017                                                                                                                                | Intergenic        | T        | C        | White <sup>(18)</sup> , European <sup>(22)</sup>                                                                | C=0.30        | C        |
| <b><i>R3HDM2-<br/>INHBC region</i></b><br><b>(chromosome 12)</b>                                                                         |                   |          |          |                                                                                                                 |               |          |
| rs1106766                                                                                                                                | Intergenic        | C        | T        | White, <sup>(18)</sup> Icelandic <sup>(16)</sup>                                                                | T=0.14        | C        |
| <b><i>RREB1</i></b><br><b>(chromosome 6)</b>                                                                                             |                   |          |          |                                                                                                                 |               |          |
| rs675209                                                                                                                                 | Intergenic        | T        | C        | White, <sup>(18)</sup><br>Icelandic, <sup>(16)</sup><br>Croatian <sup>(15)</sup><br>European <sup>(5, 22)</sup> | C=0.45        | C        |
| <b><i>NRXN2</i></b><br><b>(chromosome 11)</b>                                                                                            |                   |          |          |                                                                                                                 |               |          |
| <b>rs478607</b>                                                                                                                          | <b>Intron</b>     | <b>G</b> | <b>A</b> | <b>European<sup>(5)</sup></b>                                                                                   | <b>G=0.28</b> | <b>B</b> |
| <b><i>UBE2Q2</i></b><br><b>(chromosome 15)</b>                                                                                           |                   |          |          |                                                                                                                 |               |          |
| rs1394125                                                                                                                                | Intron            | A        | G        | European <sup>(5)</sup>                                                                                         | G=0.26        | C        |
| <b><i>IGF1R</i></b><br><b>(chromosome 15)</b>                                                                                            |                   |          |          |                                                                                                                 |               |          |
| rs6598541                                                                                                                                | Intron            | A        | G        | European <sup>(5)</sup>                                                                                         | A=0.45        | C        |
| <b><i>NFAT5</i></b><br><b>(chromosome 16)</b>                                                                                            |                   |          |          |                                                                                                                 |               |          |
| <b>rs71931165778</b>                                                                                                                     | <b>Intergenic</b> | <b>C</b> | <b>T</b> | <b>European<sup>(5)</sup></b>                                                                                   | <b>C=0.08</b> | <b>B</b> |
| <b><i>HLF</i></b><br><b>(chromosome 17)</b>                                                                                              |                   |          |          |                                                                                                                 |               |          |
| <b>rs7224610</b>                                                                                                                         | <b>Intron</b>     | <b>C</b> | <b>A</b> | <b>European<sup>(5)</sup></b>                                                                                   | <b>C=0.22</b> | <b>A</b> |
| <b><i>Excluded SNPs</i></b><br><b>of n=68</b>                                                                                            |                   |          |          |                                                                                                                 |               |          |
| Reason #1:<br>Missing from<br>database                                                                                                   |                   |          |          |                                                                                                                 |               |          |
| 4 SNPs were not available in the HANDLS genotype imputed database: Status E.                                                             |                   |          |          |                                                                                                                 |               |          |
| AA                                                                                                                                       | rs12800450        |          |          |                                                                                                                 |               |          |
| Korean                                                                                                                                   | rs1529909         |          |          |                                                                                                                 |               |          |
| Whites                                                                                                                                   | rs2199936         |          |          |                                                                                                                 |               |          |
| Hispanic                                                                                                                                 | rs6843466         |          |          |                                                                                                                 |               |          |
| Reason #2: Poor<br>imputation<br>quality                                                                                                 |                   |          |          |                                                                                                                 |               |          |
| SNP rs72552713 has poor imputation quality (imputation quality measure of R <sup>2</sup> = 0.0073: Status F                              |                   |          |          |                                                                                                                 |               |          |
| Reason #3: High<br>linkage<br>disequilibrium<br>with another SNP                                                                         |                   |          |          |                                                                                                                 |               |          |
| At LD R <sup>2</sup> of 0.8, in 500 kb window, LD pruning was done, regardless of MAF; 20/63 were excluded, resulting in 43 tag<br>SNPs. |                   |          |          |                                                                                                                 |               |          |
| 12 found to be associated with baseline SUA (Status A)                                                                                   |                   |          |          |                                                                                                                 |               |          |

---

3 found to be associated with SUA rate of change (Status B)  
28 non-significant (Status C)  
20 remaining SNPs (Status D)

---

***Initially selected***

***SNPs: n=43***

---

***Finally selected***

***SNPs:***

***N=15 (12 for  
baseline and 3  
for rate of  
change in SUA)***

---

Note: Minor allele frequency is obtained from: <http://www.ncbi.nlm.nih.gov/snp>, except when bolded (the MAF is obtained from a study). The risk allele is determined from the largest study. **Both risk allele and other allele indicate the direction of reported association with serum uric acid (SUA) in previous studies regardless of their allele frequency in the population. Minor Allele Frequency indicates which allele (risk or other) is the less frequent one.**

## References

1. Reginato AM, Mount DB, Yang I *et al.* (2012) The genetics of hyperuricaemia and gout. *Nature reviews Rheumatology* **8**, 610-621.
2. Voruganti VS, Laston S, Haack K *et al.* (2015) Serum uric acid concentrations and SLC2A9 genetic variation in Hispanic children: the Viva La Familia Study. *The American Journal of Clinical Nutrition* **101**, 725-732.
3. Yang B, Mo Z, Wu C *et al.* (2014) A genome-wide association study identifies common variants influencing serum uric acid concentrations in a Chinese population. *BMC Medical Genomics* **7**, 10.
4. Li C, Yu Q, Han L *et al.* (2014) The hURAT1 rs559946 polymorphism and the incidence of gout in Han Chinese men. *Scandinavian journal of rheumatology* **43**, 35-42.
5. Kottgen A (2013) Genome-wide association analyses identify 18 new loci associated with serum urate concentrations. *Nat Genet* **45**, 145 - 154.
6. Vitart V (2008) SLC2A9 is a newly identified urate transporter influencing serum urate concentration, urate excretion and gout. *Nat Genet* **40**, 437 - 442.
7. Doring A (2008) SLC2A9 influences uric acid concentrations with pronounced sex-specific effects. *Nat Genet* **40**, 430 - 436.
8. Wallace C (2008) Genome-wide association study identifies genes for biomarkers of cardiovascular disease: serum urate and dyslipidemia. *Am J Hum Genet* **82**, 139 - 149.
9. Dehghan A (2008) High serum uric acid as a novel risk factor for type 2 diabetes. *Diabetes Care* **31**, 361 - 362.
10. Brandstatter A (2008) Sex-specific association of the putative fructose transporter SLC2A9 variants with uric acid levels is modified by BMI. *Diabetes Care* **31**, 1662 - 1667.
11. Charles BA, Shriner D, Doumatey A *et al.* (2011) A genome-wide association study of serum uric acid in African Americans. *BMC Med Genomics* **4**, 17.
12. Tin A, Woodward OM, Kao WH *et al.* (2011) Genome-wide association study for serum urate concentrations and gout among African Americans identifies genomic risk loci and a novel URAT1 loss-of-function allele. *Hum Mol Genet* **20**, 4056-4068.
13. Kolz M (2009) Meta-analysis of 28,141 individuals identifies common variants within five new loci that influence uric acid concentrations. *PLoS Genet* **5**, e1000504.
14. Stark K, Reinhard W, Neureuther K *et al.* (2008) Association of common polymorphisms in GLUT9 gene with gout but not with coronary artery disease in a large case-control study. *PLoS one* **3**, e1948.

15. Karns R, Zhang G, Sun G *et al.* (2012) Genome-wide association of serum uric acid concentration: replication of sequence variants in an island population of the Adriatic coast of Croatia. *Ann Hum Genet* **76**, 121-127.
16. Sulem P, Gudbjartsson DF, Walters GB *et al.* (2011) Identification of low-frequency variants associated with gout and serum uric acid levels. *Nat Genet* **43**, 1127-1130.
17. Li S (2007) The GLUT9 gene is associated with serum uric acid levels in Sardinia and Chianti cohorts. *PLoS Genet* **3**, e194.
18. Yang Q, Kottgen A, Dehghan A *et al.* (2010) Multiple genetic loci influence serum urate levels and their relationship with gout and cardiovascular disease risk factors. *Circulation Cardiovascular genetics* **3**, 523-530.
19. Dehghan A (2008) Association of three genetic loci with uric acid concentration and risk of gout: a genome-wide association study. *Lancet* **372**, 1953 - 1961.
20. Hollis-Moffatt JE, Xu X, Dalbeth N *et al.* (2009) Role of the urate transporter SLC2A9 gene in susceptibility to gout in New Zealand Maori, Pacific Island, and Caucasian case-control sample sets. *Arthritis and rheumatism* **60**, 3485-3492.
21. McArdle PF, Parsa A, Chang YP *et al.* (2008) Association of a common nonsynonymous variant in GLUT9 with serum uric acid levels in old order amish. *Arthritis and rheumatism* **58**, 2874-2881.
22. Phipps-Green AJ, Merriman ME, Topless R *et al.* (2014) Twenty-eight loci that influence serum urate levels: analysis of association with gout. *Ann Rheum Dis*.
23. Matsuo H (2011) Identification of ABCG2 dysfunction as a major factor contributing to gout. *Nucleosides Nucleotides Nucleic Acids* **30**, 1098 - 1104.
24. Woodward O (2009) Identification of a urate transporter, ABCG2, with a common functional polymorphism causing gout. *Proc Natl Acad Sci U S A* **106**, 10338 - 10342.
25. Wang B, Miao Z, Liu S *et al.* (2010) Genetic analysis of ABCG2 gene C421A polymorphism with gout disease in Chinese Han male population. *Human genetics* **127**, 245-246.
26. Yamagishi K (2010) The rs2231142 variant of the ABCG2 gene is associated with uric acid levels and gout among Japanese people. *Rheumatology* **49**, 1461 - 1465.
27. Phipps-Green AJ, Hollis-Moffatt JE, Dalbeth N *et al.* (2010) A strong role for the ABCG2 gene in susceptibility to gout in New Zealand Pacific Island and Caucasian, but not Maori, case and control sample sets. *Hum Mol Genet* **19**, 4813-4819.
28. Caulfield M (2008) SLC2A9 is a high-capacity urate transporter in humans. *PLoS Med* **5**, e197.
29. Tu HP, Chen CJ, Lee CH *et al.* (2010) The SLC22A12 gene is associated with gout in Han Chinese and Solomon Islanders. *Ann Rheum Dis* **69**, 1252-1254.
30. Graessler J, Graessler A, Unger S *et al.* (2006) Association of the human urate transporter 1 with reduced renal uric acid excretion and hyperuricemia in a German Caucasian population. *Arthritis and rheumatism* **54**, 292-300.
31. Li C, Han L, Levin AM *et al.* (2010) Multiple single nucleotide polymorphisms in the human urate transporter 1 (hURAT1) gene are associated with hyperuricaemia in Han Chinese. *Journal of medical genetics* **47**, 204-210.
32. Shima Y, Teruya K, Ohta H (2006) Association between intronic SNP in urate-anion exchanger gene, SLC22A12, and serum uric acid levels in Japanese. *Life sciences* **79**, 2234-2237.
33. Guan M (2011) Association of an intronic SNP of SLC2A9 gene with serum uric acid levels in the Chinese male Han population by high-resolution melting method. *Clin Rheumatol* **30**, 29 - 35.
34. Jang WC, Nam YH, Park SM *et al.* (2008) T6092C polymorphism of SLC22A12 gene is associated with serum uric acid concentrations in Korean male subjects. *Clinica chimica acta; international journal of clinical chemistry* **398**, 140-144.
35. van der Harst P, Bakker SJ, de Boer RA *et al.* (2010) Replication of the five novel loci for uric acid concentrations and potential mediating mechanisms. *Hum Mol Genet* **19**, 387-395.



## Online Supplemental Material

36. Urano W, Taniguchi A, Anzai N *et al.* (2010) Sodium-dependent phosphate cotransporter type 1 sequence polymorphisms in male patients with gout. *Ann Rheum Dis* **69**, 1232-1234.
37. Hollis-Moffatt JE, Phipps-Green AJ, Chapman B *et al.* (2012) The renal urate transporter SLC17A1 locus: confirmation of association with gout. *Arthritis research & therapy* **14**, R92.

## Appendix 2. Mixed-effects regression models

The main multiple mixed-effects regression models can be summarized as follows:

---

### Multi-level models vs. Composite models

|                |                                                            |                                                                                                |                                                                                 |
|----------------|------------------------------------------------------------|------------------------------------------------------------------------------------------------|---------------------------------------------------------------------------------|
| <b>Eq.</b>     |                                                            | $\pi_{0i} = \gamma_{00} + \gamma_{0a}X_{a_{ij}} + \sum_{k=1}^l \gamma_{0k}Z_{ik} + \zeta_{0i}$ | $Y_{ij} = \gamma_{00} + \gamma_{0a}X_{a_{ij}} + \sum_{k=1}^l \gamma_{0k}Z_{ik}$ |
| <b>1.1-1.4</b> | $Y_{ij} = \pi_{0i} + \pi_{1i}Time_{ij} + \varepsilon_{ij}$ | $\pi_{1i} = \gamma_{10} + \gamma_{1a}X_{a_{ij}} + \sum_{m=1}^n \gamma_{1m}Z_{im} + \zeta_{1i}$ | $+ \gamma_{10}Time_{ij} + \gamma_{1a}X_{a_{ij}}Time_{ij}$                       |
|                |                                                            |                                                                                                | $+ \sum_{m=1}^n \gamma_{1m}Z_{im}Time_{ij}$                                     |
|                |                                                            |                                                                                                | $+ (\zeta_{0i} + \zeta_{1i}Time_{ij} + \varepsilon_{ij})$                       |

---

Where  $Y_{ij}$  is the outcome (SUA) for each individual “i” and visit “j”;  $\pi_{0i}$  is the level-1 intercept for individual i;  $\pi_{1i}$  is the level-1 slope for individual i;  $\gamma_{00}$  is the level-2 intercept of the random intercept  $\pi_{0i}$ ;  $\gamma_{10}$  is the level-2 intercept of the slope  $\pi_{1i}$ ;  $Z_{ik}$  is a vector of fixed covariates for each individual  $i$  that are used to predict level-1 intercepts and slopes and included baseline age ( $Age_{base}$ ) among other covariates.  $X_{ija}$  represents the main predictor variables (8 dietary components or the two dummy variables for GRS tertiles);  $\zeta_{0i}$  and  $\zeta_{1i}$  are level-2 disturbances;  $\varepsilon_{ij}$  is the within-person level-1 disturbance. Of primary interest are the main effects of each exposure  $X_a$  ( $\gamma_{0a}$ ) and their interaction with  $TIME$  ( $\gamma_{1a}$ ), as described in a previous methodological paper.(1)

### Reference

1. Blackwell E, de Leon CF, Miller GE. Applying mixed regression models to the analysis of repeated-measures data in psychosomatic medicine. *Psychosom Med* 2006;68(6):870-8. doi: 01.psy.0000239144.91689.ca [pii]

10.1097/01.psy.0000239144.91689.ca.

**Supplemental Table 2. Mixed-effects regression models of SUA by each of the 15 selected SNP<sup>1,2</sup>**

|                                                 | Gene locus    | Risk allele | $\gamma \pm \text{SEE}$ | p-value               |
|-------------------------------------------------|---------------|-------------|-------------------------|-----------------------|
|                                                 |               | Dosage      |                         |                       |
| Serum Uric Acid                                 |               |             | n=766 <sup>3</sup>      | n'=1,341 <sup>3</sup> |
| <b>Model 1: rs1260326</b>                       | <i>GCKR</i>   | T(0,1,2)    |                         |                       |
| rs1260326 ( $\gamma_{01}$ for $\pi_{0i}$ )      |               |             | <b>+0.204±0.099</b>     | <b>0.041</b>          |
| rs1260326×Time ( $\gamma_{11}$ for $\pi_{1i}$ ) |               |             | +0.027±0.024            | 0.26                  |
| <b>Model 2: rs1312969</b>                       | <i>SLC2A9</i> | T(0,1,2)    |                         |                       |
| rs1312969 ( $\gamma_{01}$ for $\pi_{0i}$ )      |               |             | <b>+0.195±0.069</b>     | <b>0.005</b>          |
| rs1312969×Time ( $\gamma_{11}$ for $\pi_{1i}$ ) |               |             | +0.003±0.016            | 0.86                  |
| <b>Model 3: rs1249874</b>                       | <i>SLC2A9</i> | A(0,1,2)    |                         |                       |
| rs1249874 ( $\gamma_{01}$ for $\pi_{0i}$ )      |               |             | <b>+0.211±0.068</b>     | <b>0.002</b>          |
| rs1249874×Time ( $\gamma_{11}$ for $\pi_{1i}$ ) |               |             | +0.012±0.016            | 0.47                  |
| <b>Model 4: rs7442295</b>                       | <i>SLC2A9</i> | A(0,1,2)    |                         |                       |
| rs7442295 ( $\gamma_{01}$ for $\pi_{0i}$ )      |               |             | <b>+0.142±0.069</b>     | <b>0.038</b>          |
| rs7442295×Time ( $\gamma_{11}$ for $\pi_{1i}$ ) |               |             | +0.014±0.016            | 0.38                  |
| <b>Model 5: rs6449213</b>                       | <i>SLC2A9</i> | T(0,1,2)    |                         |                       |
| rs6449213 ( $\gamma_{01}$ for $\pi_{0i}$ )      |               |             | <b>+0.256±0.095</b>     | <b>0.007</b>          |
| rs6449213×Time ( $\gamma_{11}$ for $\pi_{1i}$ ) |               |             | +0.025±0.023            | 0.27                  |
| <b>Model 6: rs1014290</b>                       | <i>SLC2A9</i> | T(0,1,2)    |                         |                       |
| rs1014290 ( $\gamma_{01}$ for $\pi_{0i}$ )      |               |             | <b>+0.199±0.073</b>     | <b>0.007</b>          |
| rs1014290×Time ( $\gamma_{11}$ for $\pi_{1i}$ ) |               |             | +0.000±0.017            | 0.98                  |
| <b>Model 7: rs9991278</b>                       | <i>SLC2A9</i> | G(0,1,2)    |                         |                       |
| rs9991278 ( $\gamma_{01}$ for $\pi_{0i}$ )      |               |             | <b>+0.213±0.084</b>     | <b>0.011</b>          |
| rs9991278×Time ( $\gamma_{11}$ for $\pi_{1i}$ ) |               |             | +0.014±0.020            | 0.46                  |

Online Supplemental Material

|                                                     |                 |          |                     |                          |
|-----------------------------------------------------|-----------------|----------|---------------------|--------------------------|
| <b>Model 8: rs2231142</b>                           | <i>ABCG2</i>    | T(0,1,2) |                     |                          |
| rs2231142 ( $\gamma_{0i}$ for $\pi_{0i}$ )          |                 |          | <b>+0.581±0.229</b> | <b>0.011<sup>3</sup></b> |
| rs2231142×Time ( $\gamma_{1i}$ for $\pi_{1i}$ )     |                 |          | +0.039±0.055        | 0.47 <sup>3</sup>        |
| <b>Model 9: rs742132</b>                            | <i>LRRC16A</i>  | G(0,1,2) |                     |                          |
| rs742132 ( $\gamma_{0i}$ for $\pi_{0i}$ )           |                 |          | +0.132±0.074        | 0.076                    |
| rs742132×Time ( $\gamma_{1i}$ for $\pi_{1i}$ )      |                 |          | -0.002±0.018        | 0.89 <sup>4</sup>        |
| <b>Model 10: rs3799344</b>                          | <i>SLC17A1</i>  | C(0,1,2) |                     |                          |
| rs3799344 ( $\gamma_{0i}$ for $\pi_{0i}$ )          |                 |          | <b>+0.185±0.072</b> | <b>0.010</b>             |
| rs3799344×Time ( $\gamma_{1i}$ for $\pi_{1i}$ )     |                 |          | -0.008±0.017        | 0.63                     |
| <b>Model 11: rs7932775</b>                          | <i>SLC22A12</i> | C(0,1,2) |                     |                          |
| rs7932775 ( $\gamma_{0i}$ for $\pi_{0i}$ )          |                 |          | <b>+0.145±0.072</b> | <b>0.045<sup>3</sup></b> |
| rs7932775×Time ( $\gamma_{1i}$ for $\pi_{1i}$ )     |                 |          | +0.013±0.017        | 0.444                    |
| <b>Model 12: rs7224610</b>                          | <i>HLF</i>      | C(0,1,2) |                     |                          |
| rs7224610 ( $\gamma_{0i}$ for $\pi_{0i}$ )          |                 |          | <b>+0.237±0.117</b> | <b>0.042</b>             |
| rs7224610×Time ( $\gamma_{1i}$ for $\pi_{1i}$ )     |                 |          | -0.043±0.028        | 0.13                     |
| <b>Model 13: rs2241480</b>                          | <i>SLC2A9</i>   | T(0,1,2) |                     |                          |
| rs2241480 ( $\gamma_{0i}$ for $\pi_{0i}$ )          |                 |          | -0.085±0.081        | 0.30                     |
| rs2241480×Time ( $\gamma_{1i}$ for $\pi_{1i}$ )     |                 |          | +0.032±0.018        | 0.096                    |
| <b>Model 14: rs478607</b>                           | <i>NRXN2</i>    | G(0,1,2) |                     |                          |
| rs478607 ( $\gamma_{0i}$ for $\pi_{0i}$ )           |                 |          | -0.030±0.069        | 0.66                     |
| rs478607×Time ( $\gamma_{1i}$ for $\pi_{1i}$ )      |                 |          | +0.027±0.016        | 0.094                    |
| <b>Model 15: rs71931165778</b>                      | <i>NFAT5</i>    | C(0,1,2) |                     |                          |
| rs71931165778 ( $\gamma_{0i}$ for $\pi_{0i}$ )      |                 |          | +0.270±0.213        | 0.21                     |
| rs71931165778×Time ( $\gamma_{1i}$ for $\pi_{1i}$ ) |                 |          | +0.080±0.047        | 0.090                    |

Abbreviations: Age<sub>base</sub>=Baseline age at visit 1, SUA=Serum Uric Acid.

<sup>1</sup> Each of the models' intercepts and slopes were further adjusted for Age<sub>base</sub>, for marital status, poverty status, education (years), baseline current smoking status, current illicit drug use and baseline body mass index, BMI centered at 30 kg.m<sup>-2</sup>, the

## Online Supplemental Material

10 principal components for population structure, and 8 key dietary factors factors in addition to total grains, total fruits, total vegetables, other meats, discretionary solid fat and discretionary oils, and the inverse mills ratio. Age<sub>base</sub> was centered at 50y, and all dietary factors were centered at their weighted means (See Table 1, Total). <sup>2</sup>Values are regression coefficients  $\gamma \pm$  standard error of the estimate (SEE). n=number of participants in the analysis; n'=total number of visits included in the analysis. <sup>3</sup> P<0.05 for interaction with sex, suggestive of a stronger positive effect among men. <sup>4</sup> P<0.05 for interaction with sex, suggestive of a stronger positive effect among women.

**Supplemental Figure 2.** Boxplot of serum uric acid (SUA) at baseline and follow-up, by sex

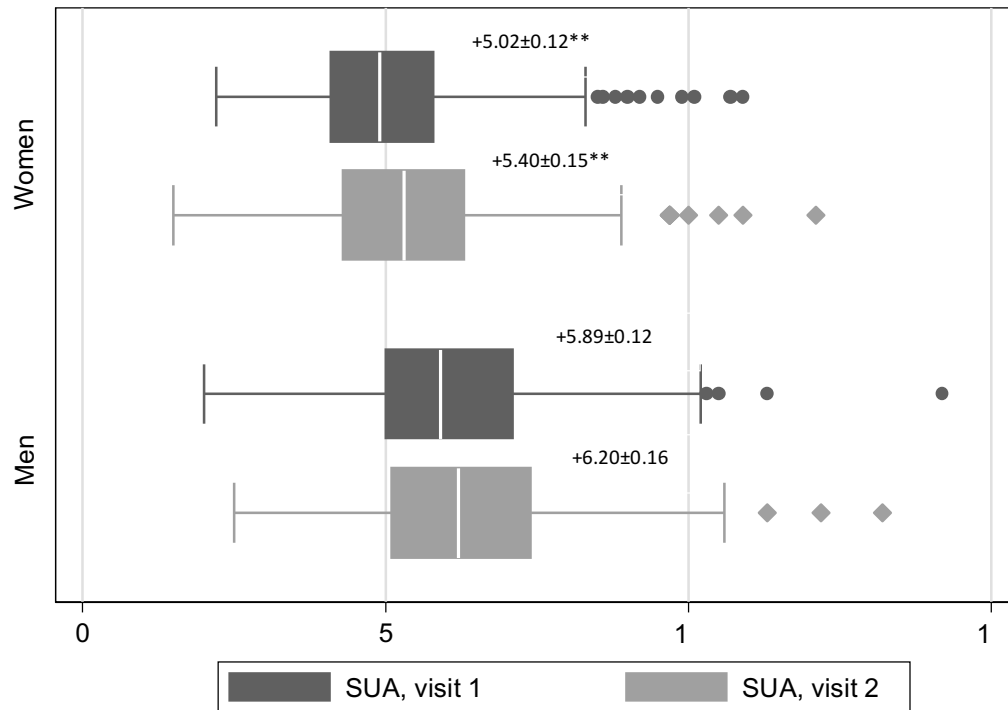

\*\*P<0.001 based on design-based F-test from linear regression models accounting for sampling weight, with SUA (visits 1 and 2) as outcome and sex as the only predictor. Values are means±standard error.

**Supplemental Figure 4.** Predictive margins of SUA by Time and dairy intake, from mixed-effects regression model, total population<sup>1</sup>

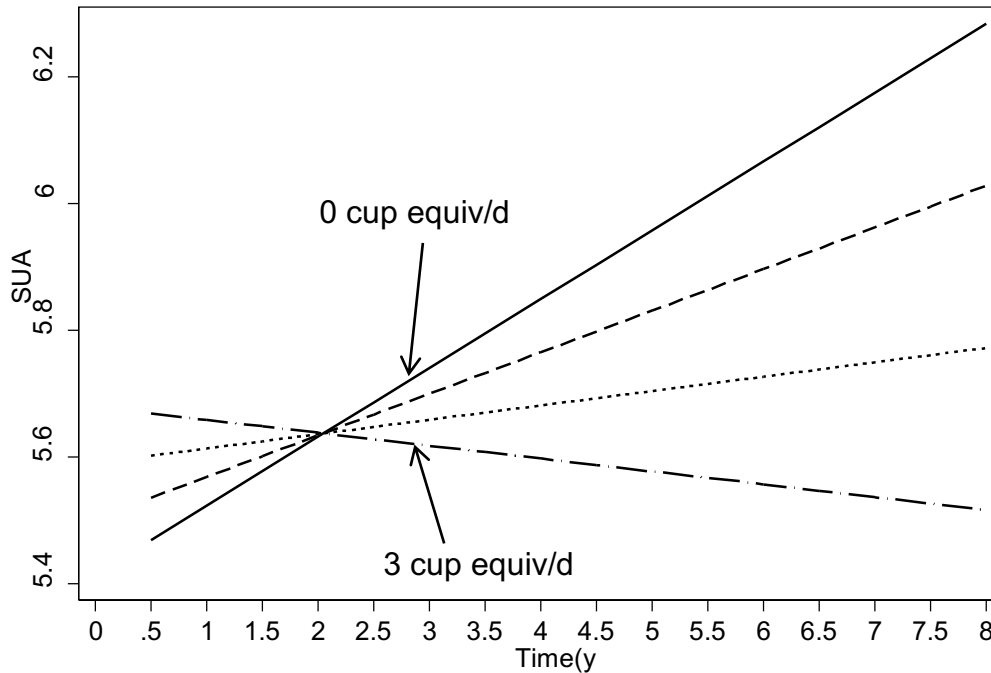

<sup>1</sup> Predictive margins obtained from mixed-effects regression model with SUA as the outcome, random effects added to slope and intercept, and both slopes and intercept adjusted for multiple factors including age, sex, poverty status, marital status, education, smoking and drug use, several dietary factors, BMI, 10 principal components for population structure and an inverse mills ratio. The Figure simulates the trajectory of a population with comparable characteristics (covariates set at their observed values in the sample) when exposed alternatively to 4 levels of dairy intakes (0,1,2,3 cups equiv./d, bottom to top) (See Table 2, Model 1).

**Supplementary Table 3. Genotype call rate and imputation quality score of serum uric acid linked genetic variants in the HANDLS study.**

| Variant    | Imputed or Genotyped | Genotype call rate | R-squared* |
|------------|----------------------|--------------------|------------|
| rs1014290  | Genotyped            | 0.99               | -          |
| rs10792443 | Imputed              | -                  | 0.99       |
| rs1106766  | Imputed              | -                  | 0.99       |
| rs11231825 | Genotyped            | 0.99               | -          |
| rs11602903 | Imputed              | -                  | 0.99       |
| rs1165196  | Genotyped            | 0.99               | -          |
| rs1165205  | Imputed              | -                  | 0.97       |
| rs11721501 | Imputed              | -                  | 0.91       |
| rs11722228 | Imputed              | -                  | 0.99       |
| rs11723388 | Imputed              | -                  | 0.91       |
| rs11723439 | Genotyped            | 0.99               | -          |
| rs11751616 | Genotyped            | 0.99               | -          |
| rs1183201  | Imputed              | -                  | 0.99       |
| rs11942223 | Imputed              | -                  | 0.99       |
| rs12356193 | Genotyped            | 0.99               | -          |
| rs12498742 | Imputed              | -                  | 0.99       |
| rs12510549 | Imputed              | -                  | 0.95       |
| rs1260326  | Genotyped            | 0.99               | -          |
| rs12800450 | NA                   | NA                 | NA         |
| rs13113918 | Genotyped            | 1                  | -          |
| rs13129697 | Genotyped            | 0.99               | -          |
| rs1394125  | Genotyped            | 0.98               | -          |
| rs1529909  | NA                   | NA                 | NA         |
| rs16890979 | Genotyped            | 0.99               | -          |
| rs17251963 | Imputed              | -                  | 0.97       |
| rs17300741 | Genotyped            | 0.99               | -          |
| rs1967017  | Genotyped            | 0.99               | -          |
| rs2051541  | Genotyped            | 0.99               | -          |
| rs2078267  | Genotyped            | 0.99               | -          |
| rs2199936  | NA                   | NA                 | NA         |
| rs2231137  | Imputed              | -                  | 0.99       |
| rs2231142  | Genotyped            | 0.99               | -          |
| rs2241480  | Genotyped            | 0.98               | -          |
| rs3114018  | Genotyped            | 0.99               | -          |
| rs3775948  | Imputed              | -                  | 0.99       |
| rs3799344  | Genotyped            | 1                  | -          |
| rs3825018  | Imputed              | -                  | 0.99       |



|            |           |      |        |
|------------|-----------|------|--------|
| rs4148152  | Genotyped | 1    | -      |
| rs4697745  | Imputed   | -    | 0.97   |
| rs478607   | Imputed   | -    | 0.99   |
| rs505802   | Genotyped | 0.99 | -      |
| rs559946   | Imputed   | -    | 0.98   |
| rs6449213  | Genotyped | 0.99 | -      |
| rs6598541  | Imputed   | -    | 0.93   |
| rs675209   | Genotyped | 0.99 | -      |
| rs6843466  | NA        | NA   | NA     |
| rs6855911  | Imputed   | -    | 0.99   |
| rs6856396  | Imputed   | -    | 0.71   |
| rs717615   | Genotyped | 0.99 | -      |
| rs7193778  | Imputed   | -    | 0.97   |
| rs7224610  | Genotyped | 1    | -      |
| rs72552713 | Imputed   | -    | 0.0073 |
| rs734553   | Genotyped | 0.99 | -      |
| rs737269   | Imputed   | -    | 0.98   |
| rs742132   | Imputed   | -    | 0.99   |
| rs7442295  | Imputed   | -    | 0.99   |
| rs7663032  | Genotyped | 0.99 | -      |
| rs7675964  | Imputed   | -    | 0.98   |
| rs7683856  | Imputed   | -    | 0.98   |
| rs780093   | Genotyped | 0.99 | -      |
| rs780094   | Genotyped | 0.99 | -      |
| rs7932775  | Genotyped | 0.99 | -      |
| rs814295   | Imputed   | -    | 0.99   |
| rs882211   | Imputed   | -    | 0.82   |
| rs893006   | Genotyped | 0.96 | -      |
| rs9321453  | Imputed   | -    | 0.99   |
| rs938552   | Imputed   | -    | 0.99   |
| rs9991278  | Imputed   | -    | 0.98   |

---

NA, SNP not available in the HANDLS study participants.

\* Variant imputation quality score, R square, was from MACH/minimac.
